# Supplementary material for: A Fully Automated Post-Surgical Brain Tumor Segmentation Model for Radiation Treatment Planning and Longitudinal Tracking
Source: MDPI journal article supplement (doi:10.3390/cancers15153956), 2023-08-03
Supplement: s1 [file s1]

**Supplemental Table S1.** Hyperparameters for every trained model.

| <b>Model</b>  | <b>Learning Rate</b> | <b>Dropout Rate</b> | <b>Batch Size</b> |
|---------------|----------------------|---------------------|-------------------|
| 2D Unet       | 0.0001               | 0.2                 | 32                |
| 2D Resunet    | 0.0001               | 0.3                 | 16                |
| 2D Swin-Unet  | 0.0001               | 0.1                 | 32                |
| 3D Unet       | 0.001                | 0.1                 | 2                 |
| 3D Swin-UNETR | 0.0008               | 0.1                 | 2                 |
